# Supplementary material
Source: Springer Nature journal article supplement (https://www.springermedizin.de/resource/supplementary/12891_2008_599_MOESM1_ESM.pdf/9506322)
Supplement: MOESM1 [file 9506322]

Patients with CTTH are identified by GPs

Screening of eligible patients  
by telephone

Research clinic:  
- Check in- and exclusion criteria  
- Informed consent  
- Baseline assessment

### Randomisation

Usual care by GP:  
- advice & education  
- pain medication  
(if needed)

Manual therapy:  
- mobilisations  
- exercise  
- postural correction

8 weeks follow-up

26 weeks follow-up
